# Supplementary material
Source: ML conference proceedings conference paper supplement (https://openaccess.thecvf.com/content/ICCV_2019/html/Wiyatno_Physical_Adversarial_Textures_ICCV_2019_paper.html)
Supplement: Supplementary file 2 [file Wiyatno_Physical_Adversarial_Textures_ICCV_2019_supplemental.zip]

Archive with 2 entries (2 files):
- 5323-supp.mp4
- 5323-supp.pdf
